# Supplementary material
Source: publisher site journal article supplement (https://www.dovepress.com/article/372358)
Supplement: Supplementary file 1 [file get_supplementary_file.php]

**Table s1. characters of different manic symptom severity change curve clusters (N=813).**

|  | | Cluster 1  N=278 | | Cluster 2  N=535 | t/x2 | p | Eta |
| --- | --- | --- | --- | --- | --- | --- | --- |
| ACTH | | 31.95 (17.54） | | 28.97 (17.59） | 2.289 | 0.022* | 0.022 |
| CORT | 399.86 (177.75) | | | 404.14 (190.06) | 0.311 | 0.756 | 0.024 |
| Medication treatment | | |  |  |  |  |  |
| Triple-therapy | | 156 | | 290 |  |  |  |
| Double-therapy | | 92 | | 198 |  |  |  |
| Mono-therapy | | 30 | | 47 | 1.686 | 0.430 | - |
| YMRS baseline | | 24.06 (10.91) | | 5.74 (8.31) | 26.691 | <0.001*** | 0.684 |
| YMRS 4 weeks | | 12.43 (8.70) | | 3.92 (5.51) | 16.988 | <0.001*** | 0.513 |
| YMRS 8 weeks | | 6.37 (7.22) | | 1.81 (3.70) | 11.782 | <0.001*** | 0.386 |
| MADRS baseline | | 15.87 (13.46) | | 23.10 (10.85) | -8.281 | <0.001*** | 0.279 |
| MADRS 4 weeks | | 10.99（8.80） | | 14.02 (8.44) | -4.777 | <0.001*** | 0.166 |
| MADRS 8 weeks | | 5.31 (6.39) | | 7.95 (7.06) | -5.220 | <0.001*** | 0.181 |
| CGI baseline | | 4.40 (1.12) | | 4.30 (1.14) | 1.153 | 0.249 | 0.040 |
| CGI 4 weeks | | 2.28 (1.19) | | 2.84 (1.15) | 0.619 | 0.536 | 0.022 |
| CGI 8 weeks | | 1.87 (0.99) | | 2.09 (0.97) | -3.130 | 0.002** | 0.109 |

Note: *p ≤ 0.05, **p ≤ 0.01, ***p ≤ 0.001
